# Supplementary material for: New Approach to Synthesizing Cathode PtCo/C Catalysts for Low-Temperature Fuel Cells
Source: MDPI journal article supplement (doi:10.3390/nano14100856), 2024-05-14
Supplement: s1 [file s1]

## Supplementary Materials

# New Approach to Synthesizing Cathode PtCo/C Catalysts for Low-Temperature Fuel Cells

Sergey Belenov <sup>1,2,\*</sup>, Dmitriy Mauer <sup>1,2</sup>, Elizabeth Moguchikh <sup>1,2</sup>, Anna Gavrilova <sup>1</sup>, Alina Nevelskaya <sup>1,3</sup>, Egor Beskopylny <sup>1,2</sup>, Ilya Pankov <sup>4</sup>, Aleksey Nikulin <sup>3</sup>, Anastasia Alekseenko <sup>1,2</sup>

<sup>1</sup> Faculty of Chemistry, Southern Federal University, 7 Zorge St., Rostov-on-Don 344090, Russia; dima333000@yandex.ru (D.M.); liza.moguchix@mail.ru (E.M.); agavrilo@sfedu.ru (A.G.); alya.nevelskaya@mail.ru (AN); gosha200225@yandex.ru (E.B.); an-an-alekseenko@yandex.ru (A.A.)

<sup>2</sup> Prometheus R&D LLC, 4G/36 Zhmaylova St., Rostov-on-Don 344091, Russia

<sup>3</sup> Federal Research Center "The Southern Scientific Center of the Russian Academy of Sciences" (SSC RAS), Federal State Budgetary Institution of Science, 41 Chekhova St., Rostov-on-Don 344006, Russia; ynikulin@sfedu.ru

<sup>4</sup> Research Institute of Physical Organic Chemistry, Southern Federal University, 194/2 Stachki St., Rostov-on-Don 344090, Russia; ipankov@sfedu.ru

\* Correspondence: sbelenov@sfedu.ru or serg1986chem@mail.ru

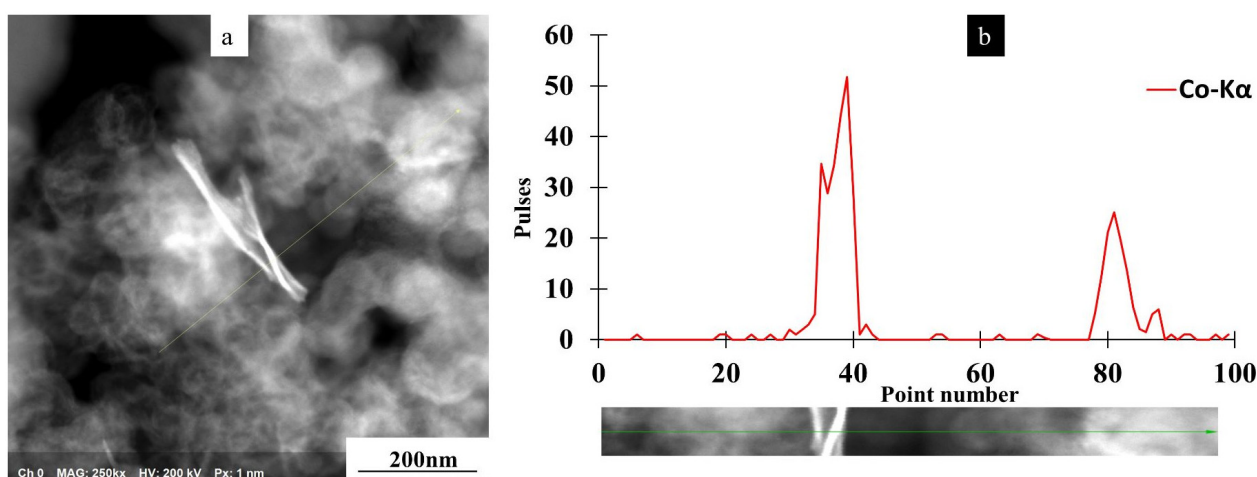

Figure S1. Line scanning for the ST-1 material.

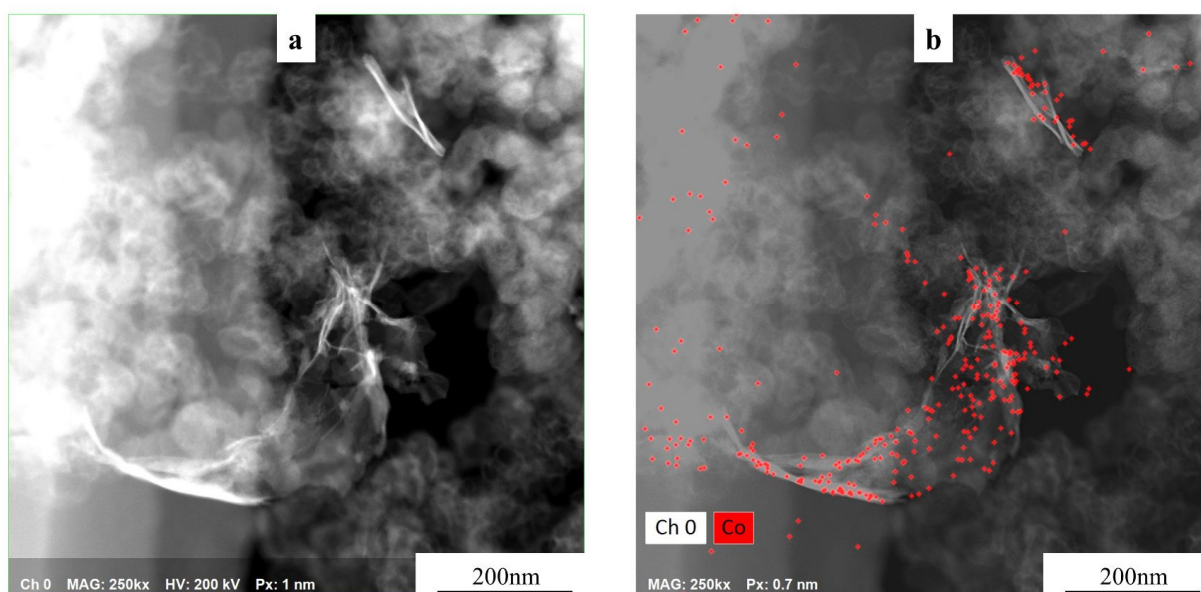

**Figure S2.** Element mapping of a separate section of the ST-1 material surface.

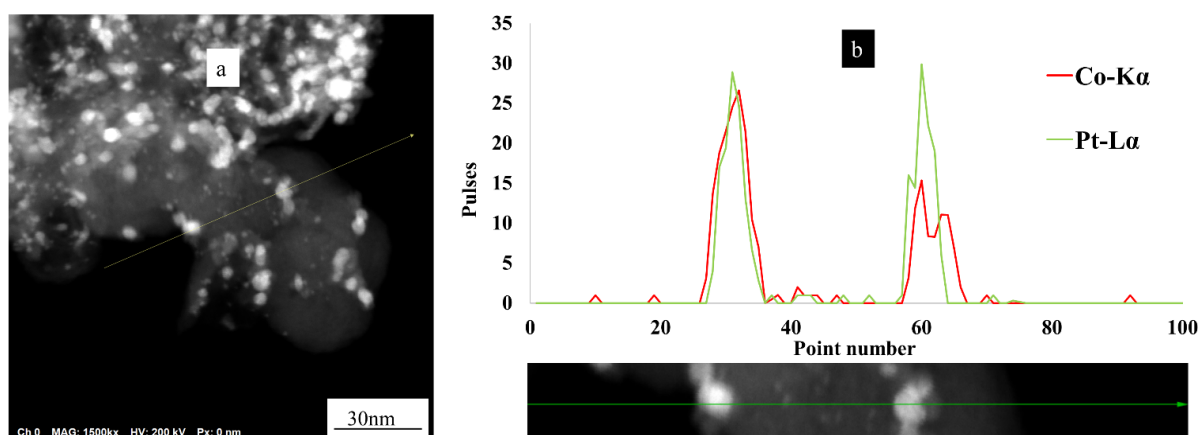

**Figure S3.** Line scanning for the ST-2 material.

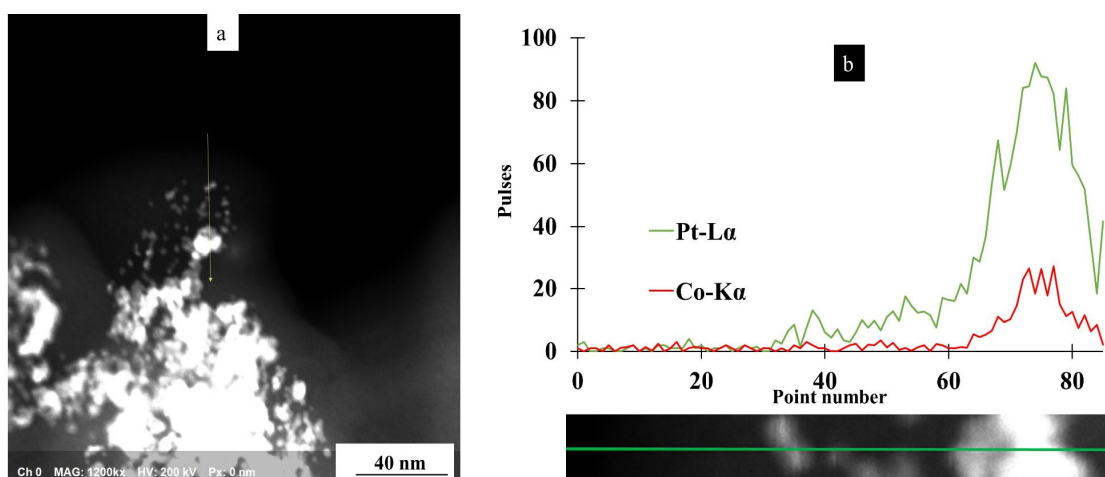

**Figure S4.** Line scanning for the ST-3 material.

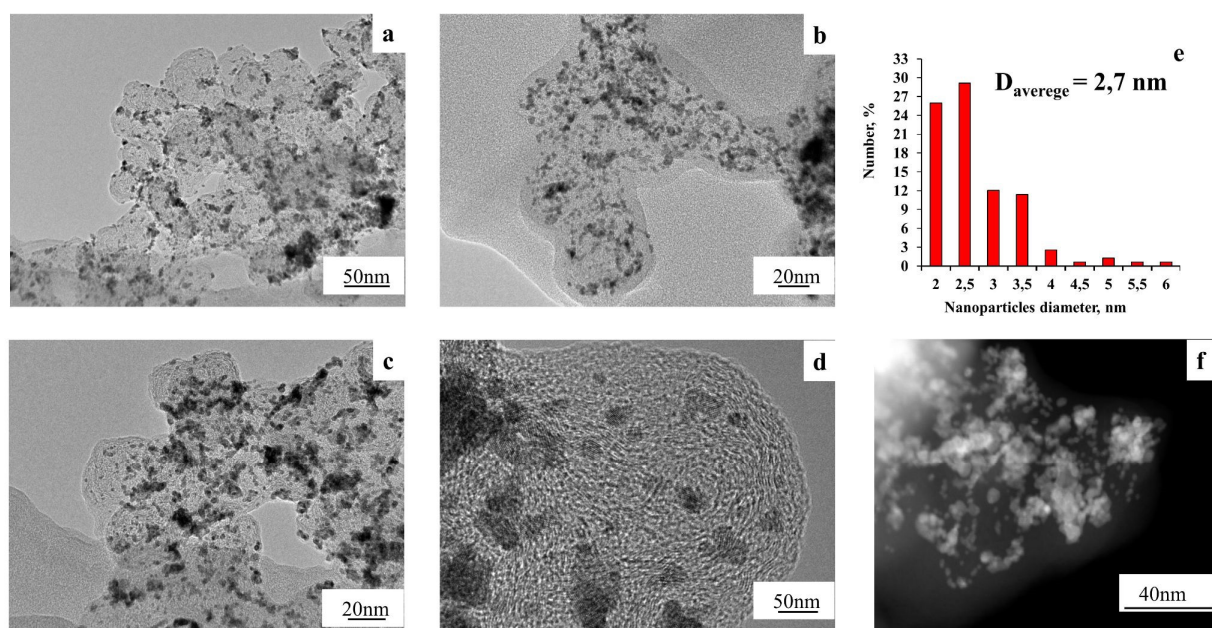

**Figure S5.** TEM micrographs and histograms of the PtCo NPs size distribution for the PtCo/C ST-3(AT) material.

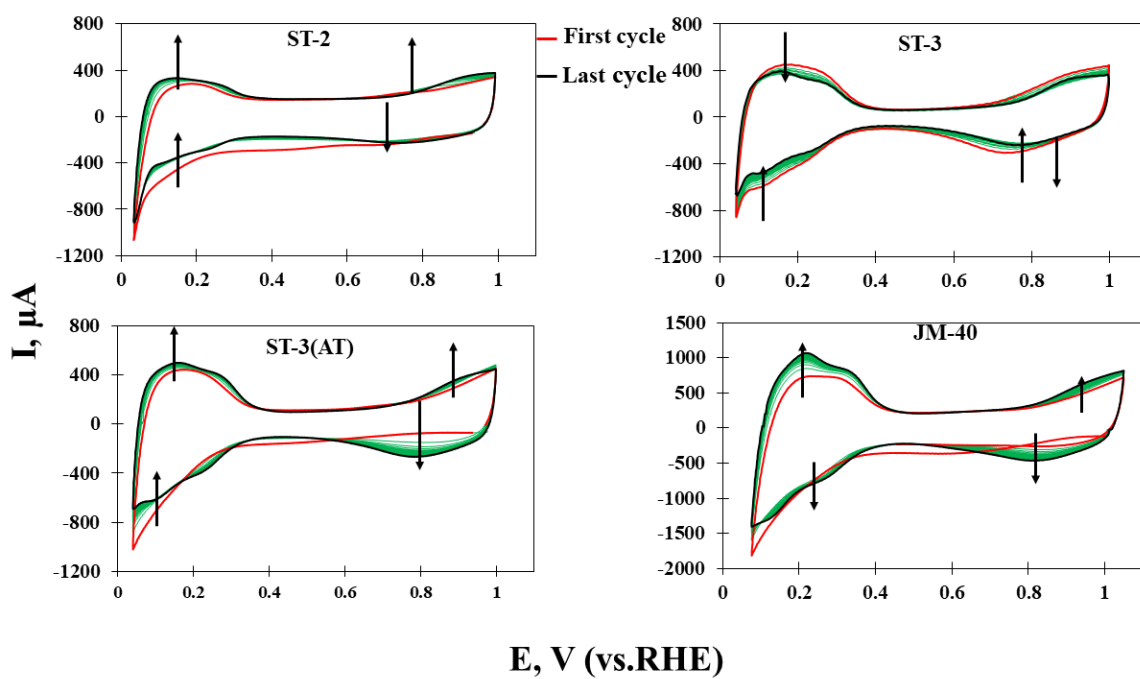

**Figure S6.** Cyclic voltammograms (100 cycles) for the PtCo/C catalysts ST-2, ST-3, ST-3(AT) and the Pt/C catalyst JM40. Electrolyte 1 M  $\text{HClO}_4$ , Ar atmosphere. The potential scanning rate is 20 mV/s.

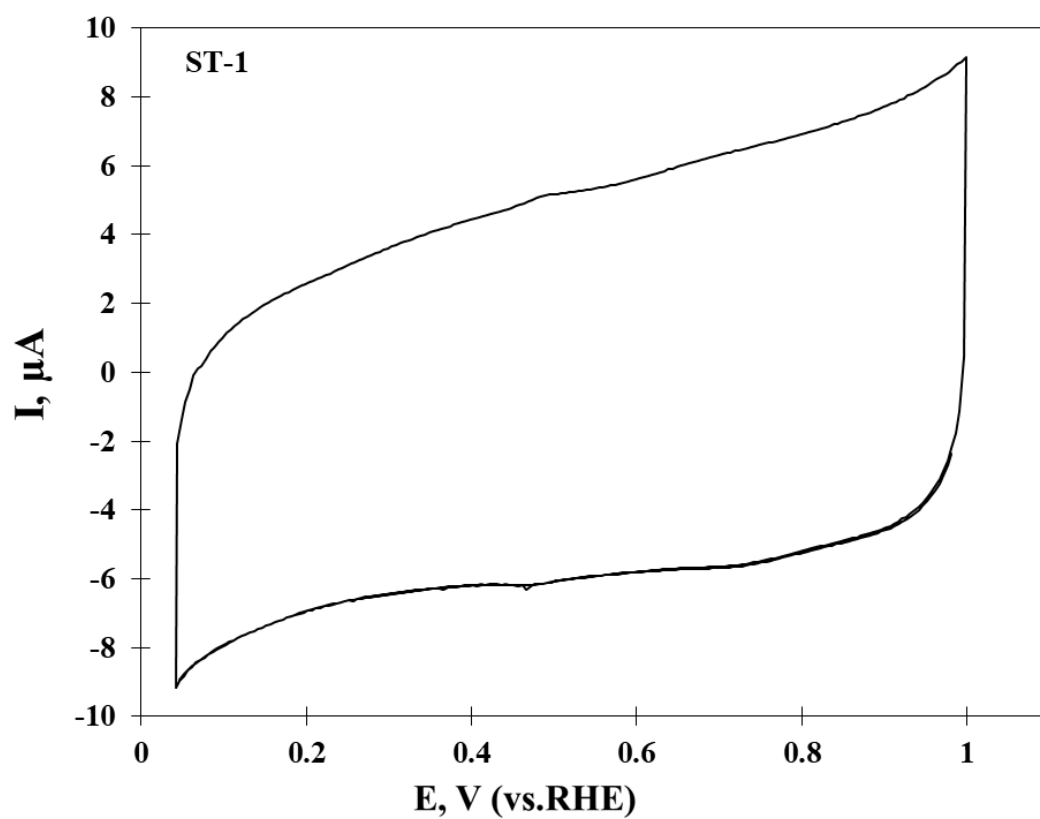

**Figure S7.** (a) Cyclic voltammograms (2nd cycle) for the Co<sub>x</sub>O<sub>y</sub>/C ST-1 material. Electrolyte 1 M HClO<sub>4</sub>, Ar atmosphere. The potential scanning rate is 20 mV/s.
